# Supplementary material for: Structure determination of amyrin isomers in cuticular waxes: a combined DFT/vibrational spectroscopy methodology
Source: Royal Society of Chemistry journal article supplement (doi:10.1039/d0ra00284d), 2020-01-01
Supplement: d0ra00284d1.pdf [file d0ra00284d1.pdf]

## Electronic Supplementary Information

**Figure S1.**- Representation of the  $\alpha$ - and  $\beta$ -amyrin isomers on their optimized forms with no PCM correction (left) and in *n*-hexane (right)

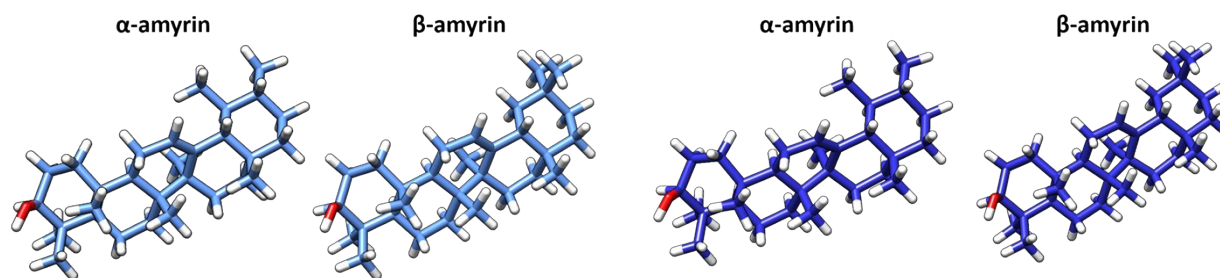

**Table TS1.-** Vibrational normal modes analysed in the Raman spectra

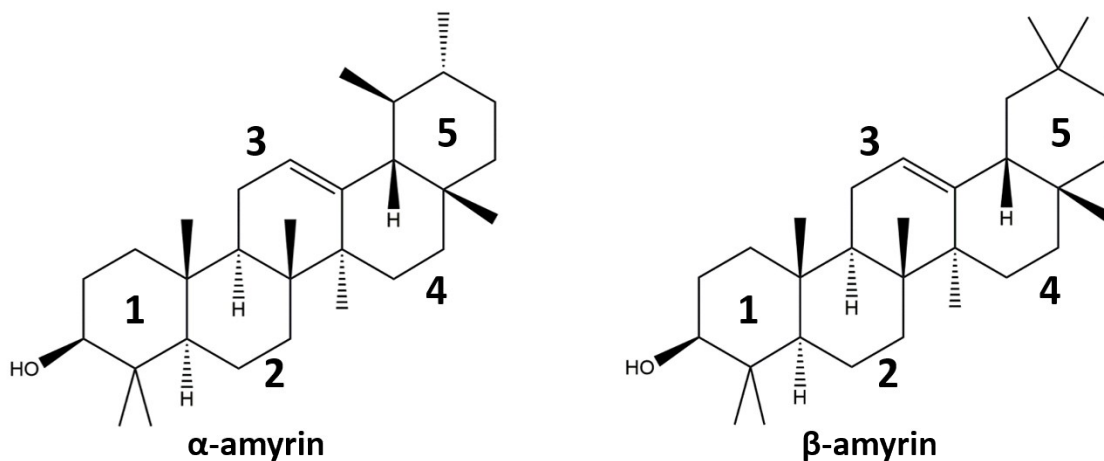

| Band | Raman shift                | Description                     | Symbol                    |
|------|----------------------------|---------------------------------|---------------------------|
| a    | $\sim 750 \text{ cm}^{-1}$ | CCC scissoring at rings 4 and 5 | $\delta(\text{CCC})_{45}$ |
| b    | $\sim 680 \text{ cm}^{-1}$ | CCC scissoring at ring 3        | $\delta(\text{CCC})_3$    |
| c    | $\sim 630 \text{ cm}^{-1}$ | CCC scissoring at ring 4        | $\delta(\text{CCC})_4$    |
| d    | $\sim 550 \text{ cm}^{-1}$ | CCC scissoring at rings 1 and 2 | $\delta(\text{CCC})_{12}$ |
| e    | $\sim 500 \text{ cm}^{-1}$ | CCC scissoring at ring 5        | $\delta(\text{CCC})_5$    |

**Figure S2.-** Representation of the eigenvectors calculated for each of the five selected bands chosen in the Raman spectra.

$\alpha$ -amyrin

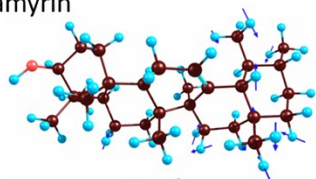

Band a

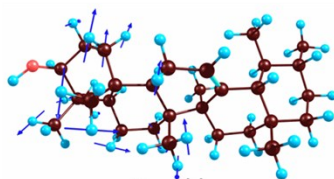

Band b

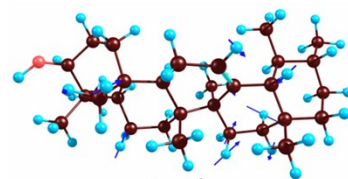

Band c

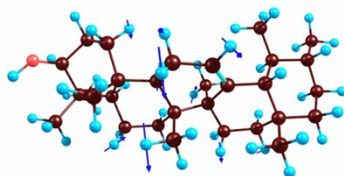

Band d

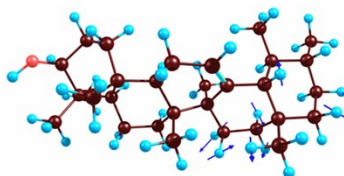

Band e

$\beta$ -amyrin

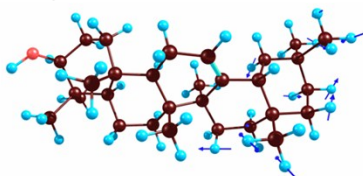

Band a

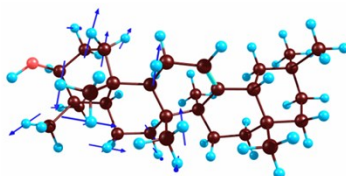

Band b

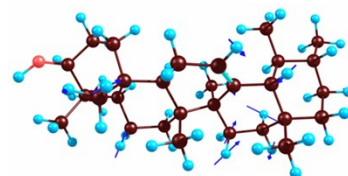

Band c

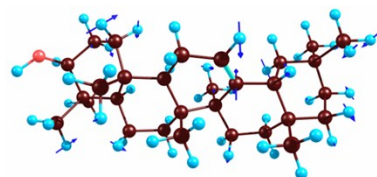

Band d

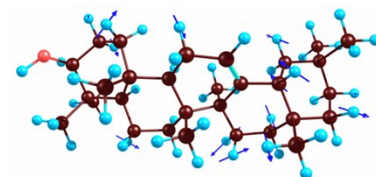

Band e

**Figure S3-** Theoretical Raman spectra (black) calculated for  $\alpha$ - and  $\beta$ -amyrin with no PCM correction and in *n*-hexane. Their corresponding experimental spectra (gray) determined at room temperature are also shown.

**NO PCM CORRECTION**

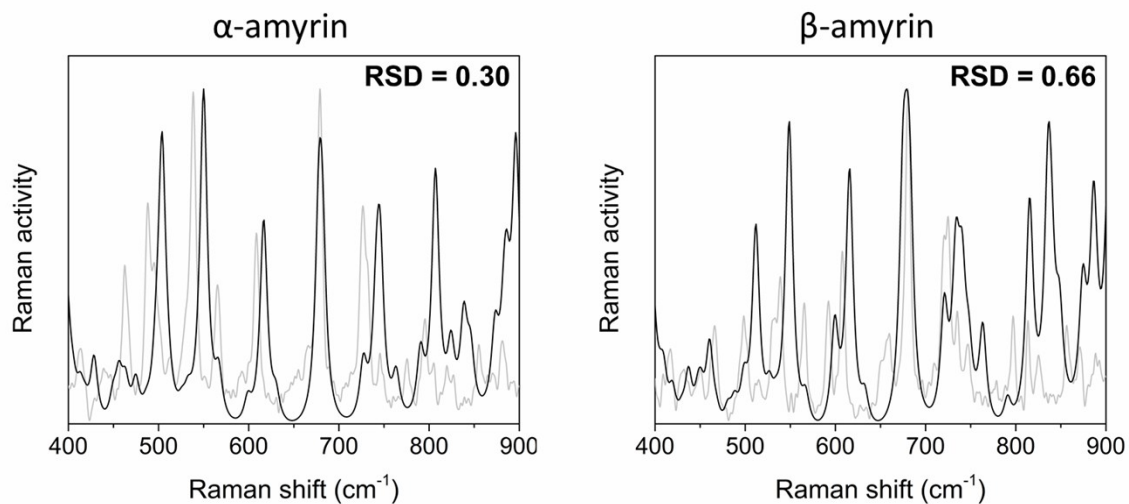

***n*-HEXANE**

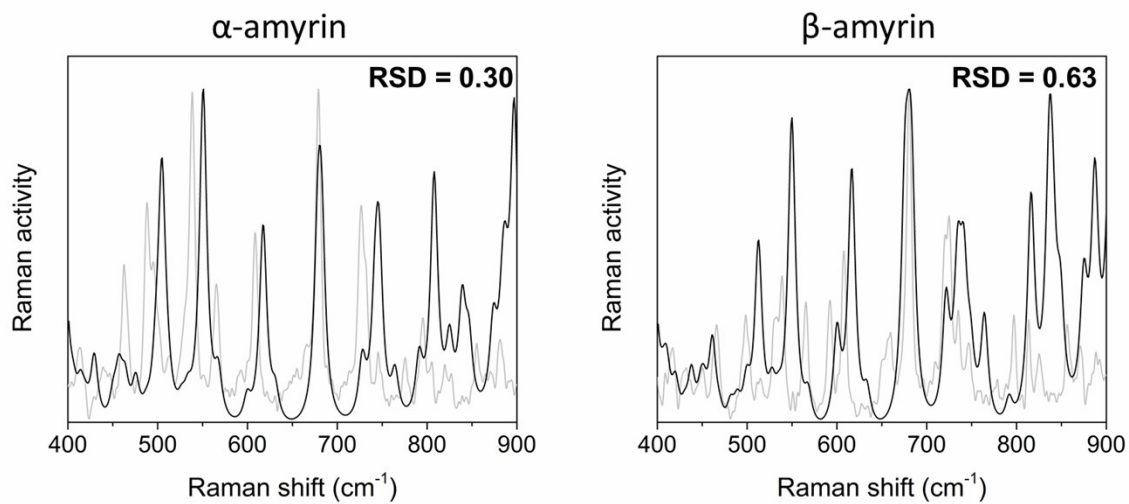

**Figure S4.-** Relative intensity patterns of the experimental (square) and the theoretical Raman spectra for  $\alpha$ - and  $\beta$ -amyrin. The three theoretical environments studied were *n*-octanol (upside triangle), *n*-hexane (downside triangle) and no PCM correction (circle).

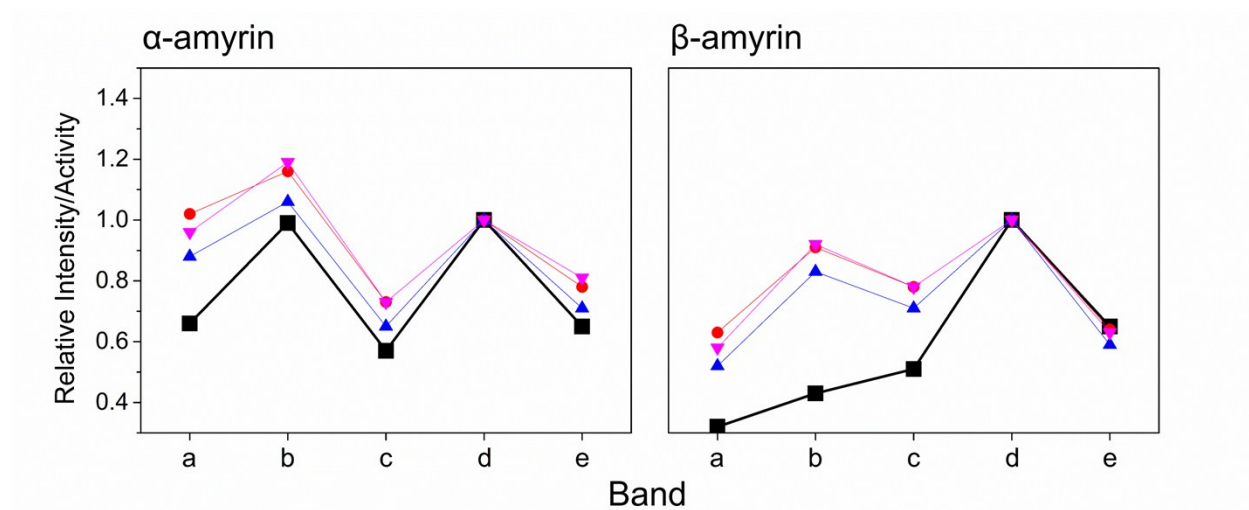

**Table TS2.-** Relative Standard Deviation (RSD) values for the calculated Raman spectra in the three PCM options for all the structures analysed.

**NO PCM CORRECTION**

| Band             | Monomer | Dimer       |             |             |             |             |             | Trimer      |             |             |             |             |             |             |
|------------------|---------|-------------|-------------|-------------|-------------|-------------|-------------|-------------|-------------|-------------|-------------|-------------|-------------|-------------|
|                  |         | dim1        | dim2        | dim3        | dim4        | dim5        | dim6        | trim31      | trim32      | trim51      | trim52      | trim61      | trim62      |             |
| $\alpha$ -amyrin | a       | 0.55        | 0.33        | 0.24        | 0.21        | 0.52        | 0.00        | 0.35        | 0.09        | 0.56        | 0.17        | 0.20        | 0.17        | 0.55        |
|                  | b       | 0.17        | 0.09        | 0.05        | 0.24        | 0.44        | 0.26        | 0.01        | 0.15        | 0.44        | 0.29        | 0.17        | 0.01        | 0.16        |
|                  | c       | 0.28        | 0.40        | 0.30        | 0.21        | 0.37        | 0.09        | 0.05        | 0.19        | 0.28        | 0.19        | 0.07        | 0.05        | 0.12        |
|                  | e       | 0.20        | 0.15        | 0.09        | 0.08        | 0.55        | 0.25        | 0.12        | 0.20        | 0.18        | 0.29        | 0.26        | 0.06        | 0.00        |
|                  | average | <b>0.30</b> | <b>0.25</b> | <b>0.17</b> | <b>0.19</b> | <b>0.47</b> | <b>0.15</b> | <b>0.13</b> | <b>0.16</b> | <b>0.37</b> | <b>0.24</b> | <b>0.18</b> | <b>0.07</b> | <b>0.21</b> |
| $\beta$ -amyrin  | a       | 0.97        | 0.66        | 0.53        | 0.56        | 0.91        | 0.47        | 0.69        | 0.28        | 0.75        | 0.47        | 0.25        | 0.75        | 0.59        |
|                  | b       | 1.12        | 0.77        | 0.79        | 1.16        | 1.37        | 0.63        | 1.02        | 0.91        | 0.91        | 1.12        | 0.44        | 0.79        | 0.93        |
|                  | c       | 0.53        | 0.41        | 0.33        | 0.39        | 0.69        | 0.10        | 0.43        | 0.18        | 0.29        | 0.37        | 0.00        | 0.18        | 0.37        |
|                  | e       | 0.02        | 0.78        | 0.17        | 0.11        | 0.06        | 0.22        | 0.15        | 0.32        | 0.05        | 0.11        | 0.38        | 0.08        | 0.08        |
|                  | average | <b>0.66</b> | <b>0.66</b> | <b>0.46</b> | <b>0.56</b> | <b>0.76</b> | <b>0.35</b> | <b>0.57</b> | <b>0.42</b> | <b>0.50</b> | <b>0.52</b> | <b>0.27</b> | <b>0.45</b> | <b>0.49</b> |

***n*-OCTANOL**

| Band             | Monomer | Dimer       |             |             |             |             |             | Trimer      |             |             |             |             |             |             |
|------------------|---------|-------------|-------------|-------------|-------------|-------------|-------------|-------------|-------------|-------------|-------------|-------------|-------------|-------------|
|                  |         | dim1        | dim2        | dim3        | dim4        | dim5        | dim6        | trim31      | trim32      | trim51      | trim52      | trim61      | trim62      |             |
| $\alpha$ -amyrin | a       | 0.33        | 0.20        | 0.20        | 0.06        | 0.32        | 0.08        | 0.09        | 0.20        | 0.33        | 0.05        | 0.00        | 0.15        | 0.35        |
|                  | b       | 0.07        | 0.05        | 0.01        | 0.05        | 0.22        | 0.22        | 0.13        | 0.05        | 0.27        | 0.33        | 0.18        | 0.03        | 0.01        |
|                  | c       | 0.14        | 0.07        | 0.16        | 0.12        | 0.19        | 0.05        | 0.04        | 0.07        | 0.25        | 0.16        | 0.16        | 0.07        | 0.07        |
|                  | e       | 0.09        | 0.02        | 0.02        | 0.03        | 0.35        | 0.20        | 0.12        | 0.02        | 0.14        | 0.03        | 0.32        | 0.00        | 0.03        |
|                  | average | <b>0.16</b> | <b>0.08</b> | <b>0.10</b> | <b>0.07</b> | <b>0.27</b> | <b>0.14</b> | <b>0.10</b> | <b>0.14</b> | <b>0.25</b> | <b>0.14</b> | <b>0.17</b> | <b>0.06</b> | <b>0.11</b> |
| $\beta$ -amyrin  | a       | 0.63        | 0.63        | 0.41        | 0.50        | 0.63        | 0.28        | 0.16        | 0.38        | 0.66        | 0.47        | 0.31        | 0.66        | 0.50        |
|                  | b       | 0.93        | 0.91        | 0.74        | 0.81        | 1.02        | 0.40        | 0.42        | 0.81        | 0.77        | 0.70        | 0.44        | 0.49        | 0.91        |
|                  | c       | 0.39        | 0.27        | 0.33        | 0.35        | 0.51        | 0.04        | 0.02        | 0.24        | 0.29        | 0.33        | 0.10        | 0.16        | 0.37        |
|                  | e       | 0.09        | 0.18        | 0.18        | 0.06        | 0.00        | 0.35        | 0.40        | 0.23        | 0.08        | 0.25        | 0.40        | 0.00        | 0.14        |
|                  | average | <b>0.51</b> | <b>0.50</b> | <b>0.42</b> | <b>0.43</b> | <b>0.54</b> | <b>0.27</b> | <b>0.25</b> | <b>0.41</b> | <b>0.45</b> | <b>0.44</b> | <b>0.31</b> | <b>0.33</b> | <b>0.48</b> |

***n*-HEXANE**

| Band             | Monomer | Dimer       |             |             |             |             |             | Trimer      |             |             |             |             |             |             |
|------------------|---------|-------------|-------------|-------------|-------------|-------------|-------------|-------------|-------------|-------------|-------------|-------------|-------------|-------------|
|                  |         | dim1        | dim2        | dim3        | dim4        | dim5        | dim6        | trim31      | trim32      | trim51      | trim52      | trim61      | trim62      |             |
| $\alpha$ -amyrin | a       | 0.45        | 0.30        | 0.21        | 0.03        | 0.53        | 0.03        | 0.20        | 0.20        | 0.39        | 0.20        | 0.03        | 0.12        | 0.42        |
|                  | b       | 0.20        | 0.06        | 0.01        | 0.14        | 0.44        | 0.22        | 0.10        | 0.14        | 0.33        | 0.25        | 0.05        | 0.01        | 0.08        |
|                  | c       | 0.28        | 0.26        | 0.23        | 0.19        | 0.42        | 0.04        | 0.02        | 0.18        | 0.26        | 0.16        | 0.32        | 0.00        | 0.16        |
|                  | e       | 0.25        | 0.12        | 0.09        | 0.00        | 0.49        | 0.14        | 0.09        | 0.18        | 0.11        | 0.26        | 0.03        | 0.02        | 0.02        |
|                  | average | <b>0.30</b> | <b>0.19</b> | <b>0.14</b> | <b>0.09</b> | <b>0.47</b> | <b>0.11</b> | <b>0.19</b> | <b>0.17</b> | <b>0.27</b> | <b>0.22</b> | <b>0.11</b> | <b>0.04</b> | <b>0.17</b> |
| $\beta$ -amyrin  | a       | 0.81        | 0.74        | 0.53        | 0.53        | 0.72        | 0.47        | 0.28        | 0.25        | 0.69        | 0.78        | 0.22        | 0.81        | 0.56        |
|                  | b       | 1.14        | 0.93        | 0.77        | 0.91        | 1.23        | 0.37        | 0.35        | 0.86        | 0.84        | 1.12        | 0.37        | 0.47        | 0.93        |
|                  | c       | 0.53        | 0.27        | 0.45        | 0.39        | 0.61        | 0.04        | 0.06        | 0.18        | 0.29        | 0.43        | 0.08        | 0.20        | 0.35        |
|                  | e       | 0.03        | 0.22        | 0.15        | 0.08        | 0.08        | 0.35        | 0.42        | 0.29        | 0.09        | 0.15        | 0.40        | 0.12        | 0.06        |
|                  | average | <b>0.63</b> | <b>0.53</b> | <b>0.48</b> | <b>0.48</b> | <b>0.66</b> | <b>0.31</b> | <b>0.28</b> | <b>0.39</b> | <b>0.48</b> | <b>0.62</b> | <b>0.27</b> | <b>0.40</b> | <b>0.48</b> |

**Table TS3.-** Comparison of the experimental and calculated intermolecular distances for all the aggregated structures studied (dimers and trimers) in the three PCM options. Each theoretical value is related to the empirical by the RSD.

**NO PCM CORRECTION**

| Distance (Å)     | Experimental | Dimer       |             |             |             |             |             | Trimer      |             |             |             |             |             |
|------------------|--------------|-------------|-------------|-------------|-------------|-------------|-------------|-------------|-------------|-------------|-------------|-------------|-------------|
|                  |              | dim1        | dim2        | dim3        | dim4        | dim5        | dim6        | trim31      | trim32      | trim51      | trim52      | trim61      | trim62      |
| $\alpha$ -amyrin | 7.7          |             |             |             |             |             |             | 6.6         | 6.6         | 6.0         | 6.0         | 6.4         | 6.7         |
|                  | 8.0          | 14.8        | 11.8        | 6.5         | 6.7         | 6.0         | 6.6         | 7.0         | 7.8         | 6.6         | 6.7         | 7.4         | 8.7         |
|                  | 8.0          |             |             |             |             |             |             | 13.4        | 8.3         | 12.5        | 6.8         | 13.3        | 9.5         |
|                  | <b>RSD</b>   | <b>0.87</b> | <b>0.49</b> | <b>0.18</b> | <b>0.15</b> | <b>0.24</b> | <b>0.16</b> | <b>0.31</b> | <b>0.07</b> | <b>0.32</b> | <b>0.18</b> | <b>0.30</b> | <b>0.13</b> |
| $\beta$ -amyrin  | 7.5          |             |             |             |             |             |             | 6.6         | 6.6         | 6.9         | 6.9         | 6.4         | 6.3         |
|                  | 7.5          | 15.1        | 10.6        | 6.6         | 6.6         | 7.2         | 6.3         | 6.7         | 6.8         | 7.6         | 7.0         | 7.0         | 7.3         |
|                  | 7.5          |             |             |             |             |             |             | 13.0        | 7.4         | 9.4         | 7.2         | 7.7         | 7.7         |
|                  | <b>RSD</b>   | <b>1.01</b> | <b>0.41</b> | <b>0.12</b> | <b>0.12</b> | <b>0.04</b> | <b>0.16</b> | <b>0.32</b> | <b>0.08</b> | <b>0.12</b> | <b>0.06</b> | <b>0.08</b> | <b>0.07</b> |

***n*-OCTANOL**

| Distance (Å)     | Experimental | Dimer       |             |             |             |             |             | Trimer      |             |             |             |             |             |
|------------------|--------------|-------------|-------------|-------------|-------------|-------------|-------------|-------------|-------------|-------------|-------------|-------------|-------------|
|                  |              | dim1        | dim2        | dim3        | dim4        | dim5        | dim6        | trim31      | trim32      | trim51      | trim52      | trim61      | trim62      |
| $\alpha$ -amyrin | 7.7          |             |             |             |             |             |             | 6.6         | 6.5         | 6.0         | 6.0         | 6.5         | 6.5         |
|                  | 8.0          | 14.8        | 11.7        | 6.5         | 6.7         | 6.0         | 6.6         | 7.0         | 7.4         | 6.6         | 6.8         | 7.4         | 7.6         |
|                  | 8.0          |             |             |             |             |             |             | 13.4        | 8.4         | 12.6        | 6.8         | 13.3        | 7.9         |
|                  | <b>RSD</b>   | <b>0.87</b> | <b>0.48</b> | <b>0.18</b> | <b>0.15</b> | <b>0.24</b> | <b>0.16</b> | <b>0.31</b> | <b>0.09</b> | <b>0.32</b> | <b>0.17</b> | <b>0.30</b> | <b>0.07</b> |
| $\beta$ -amyrin  | 7.5          |             |             |             |             |             |             | 6.7         | 6.6         | 7.4         | 6.9         | 6.3         | 6.3         |
|                  | 7.5          | 12.1        | 10.6        | 6.7         | 6.6         | 7.4         | 7.0         | 6.7         | 6.8         | 7.5         | 7.0         | 6.7         | 7.3         |
|                  | 7.5          |             |             |             |             |             |             | 13.0        | 7.4         | 13.6        | 7.2         | 8.0         | 7.7         |
|                  | <b>RSD</b>   | <b>0.61</b> | <b>0.41</b> | <b>0.11</b> | <b>0.12</b> | <b>0.01</b> | <b>0.07</b> | <b>0.32</b> | <b>0.08</b> | <b>0.28</b> | <b>0.06</b> | <b>0.11</b> | <b>0.07</b> |

***n*-HEXANE**

| Distance (Å)     | Experimental | Dimer       |             |             |             |             |             | Trimer      |             |             |             |             |             |
|------------------|--------------|-------------|-------------|-------------|-------------|-------------|-------------|-------------|-------------|-------------|-------------|-------------|-------------|
|                  |              | dim1        | dim2        | dim3        | dim4        | dim5        | dim6        | trim31      | trim32      | trim51      | trim52      | trim61      | trim62      |
| $\alpha$ -amyrin | 7.7          |             |             |             |             |             |             | 6.6         | 6.6         | 6.0         | 6.0         | 6.5         | 6.5         |
|                  | 8.0          | 14.8        | 11.6        | 6.5         | 6.7         | 6.0         | 6.6         | 7.0         | 7.8         | 6.6         | 6.7         | 7.4         | 7.6         |
|                  | 8.0          |             |             |             |             |             |             | 13.4        | 8.3         | 12.6        | 6.8         | 13.3        | 7.9         |
|                  | <b>RSD</b>   | <b>0.87</b> | <b>0.47</b> | <b>0.18</b> | <b>0.15</b> | <b>0.24</b> | <b>0.16</b> | <b>0.31</b> | <b>0.07</b> | <b>0.32</b> | <b>0.18</b> | <b>0.30</b> | <b>0.07</b> |
| $\beta$ -amyrin  | 7.5          |             |             |             |             |             |             | 6.6         | 6.6         | 7.3         | 6.9         | 6.3         | 6.3         |
|                  | 7.5          | 12.0        | 10.6        | 6.6         | 6.6         | 7.4         | 7.0         | 6.7         | 6.8         | 7.6         | 7.0         | 6.7         | 7.3         |
|                  | 7.5          |             |             |             |             |             |             | 13.0        | 7.4         | 11.0        | 7.2         | 8.0         | 7.7         |
|                  | <b>RSD</b>   | <b>0.60</b> | <b>0.41</b> | <b>0.12</b> | <b>0.12</b> | <b>0.01</b> | <b>0.07</b> | <b>0.32</b> | <b>0.08</b> | <b>0.17</b> | <b>0.06</b> | <b>0.11</b> | <b>0.07</b> |

**Table TS4.-** Binding energies (BE) and relative binding energies (RBE) in kcal·mol<sup>-1</sup> for all the aggregated structures of  $\alpha$ - and  $\beta$ -amyrin in the three PCM options.

**NO PCM CORRECTION**

| Energy (kcal·mol <sup>-1</sup> ) |     | Dimer |       |       |       |       |       | Trimer |        |        |        |        |        |
|----------------------------------|-----|-------|-------|-------|-------|-------|-------|--------|--------|--------|--------|--------|--------|
|                                  |     | dim1  | dim2  | dim3  | dim4  | dim5  | dim6  | trim31 | trim32 | trim51 | trim52 | trim61 | trim62 |
| $\alpha$ -amyrin                 | BE  | -12.5 | -9.4  | -14.7 | -11.8 | -17.6 | -16.9 | -27.5  | -34.5  | -31.2  | -42.2  | -29.3  | -36.1  |
|                                  | RBE | -6.2  | -4.7  | -7.3  | -5.9  | -8.8  | -8.5  | -9.2   | -11.5  | -10.4  | -14.1  | -9.8   | -12.0  |
| $\beta$ -amyrin                  | BE  | -10.9 | -12.2 | -14.9 | -12.3 | -13.1 | -19.7 | -27.5  | -40.1  | -33.0  | -38.3  | -40.6  | -40.4  |
|                                  | RBE | -5.4  | -6.14 | -7.4  | -6.2  | -6.5  | -9.9  | -9.2   | -13.4  | -11.0  | -12.8  | -13.5  | -13.5  |

***n*-OCTANOL**

| Energy (kcal·mol <sup>-1</sup> ) |     | Dimer |       |       |       |       |       | Trimer |        |        |        |        |        |
|----------------------------------|-----|-------|-------|-------|-------|-------|-------|--------|--------|--------|--------|--------|--------|
|                                  |     | dim1  | dim2  | dim3  | dim4  | dim5  | dim6  | trim31 | trim32 | trim51 | trim52 | trim61 | trim62 |
| $\alpha$ -amyrin                 | BE  | -11.8 | -8.5  | -14.5 | -11.7 | -17.4 | -16.3 | -27.2  | -33.7  | -30.8  | -41.4  | -28.5  | -36.1  |
|                                  | RBE | -5.9  | -4.3  | -7.2  | -5.9  | -8.7  | -8.2  | -9.1   | -11.2  | -10.3  | -13.8  | -9.5   | -12.0  |
| $\beta$ -amyrin                  | BE  | -12.3 | -11.1 | -14.7 | -12.3 | -12.8 | -14.9 | -27.5  | -40.1  | -33.0  | -38.3  | -40.6  | -40.4  |
|                                  | RBE | -6.2  | -5.6  | -7.3  | -6.1  | -6.4  | -7.4  | -9.2   | -13.4  | -11.0  | -12.8  | -13.5  | -13.5  |

***n*-HEXANE**

| Energy (kcal·mol <sup>-1</sup> ) |     | Dimer |       |       |       |       |       | Trimer |        |        |        |        |        |
|----------------------------------|-----|-------|-------|-------|-------|-------|-------|--------|--------|--------|--------|--------|--------|
|                                  |     | dim1  | dim2  | dim3  | dim4  | dim5  | dim6  | trim31 | trim32 | trim51 | trim52 | trim61 | trim62 |
| $\alpha$ -amyrin                 | BE  | -12.1 | -9.0  | -14.6 | -11.7 | -17.5 | -16.7 | -27.3  | -34.2  | -31.0  | -41.9  | -29.0  | -36.5  |
|                                  | RBE | -6.1  | -4.5  | -7.3  | -5.9  | -8.7  | -8.3  | -9.1   | -11.4  | -10.3  | -14.0  | -9.7   | -12.2  |
| $\beta$ -amyrin                  | BE  | -13.9 | -12.9 | -15.9 | -13.4 | -14.0 | -16.2 | -27.4  | -39.6  | -30.9  | -38.1  | -39.7  | -40.0  |
|                                  | RBE | -6.9  | -6.5  | -7.9  | -6.7  | -7.0  | -8.1  | -9.1   | -13.2  | -10.3  | -12.7  | -13.2  | -13.3  |



**Figure S5.-** Comparison of the experimental Raman spectra at room temperature (gray) with those calculated for  $\alpha$ - and  $\beta$ -amyrin dimers in the three PCM options (black).

**NO PCM CORRECTION**

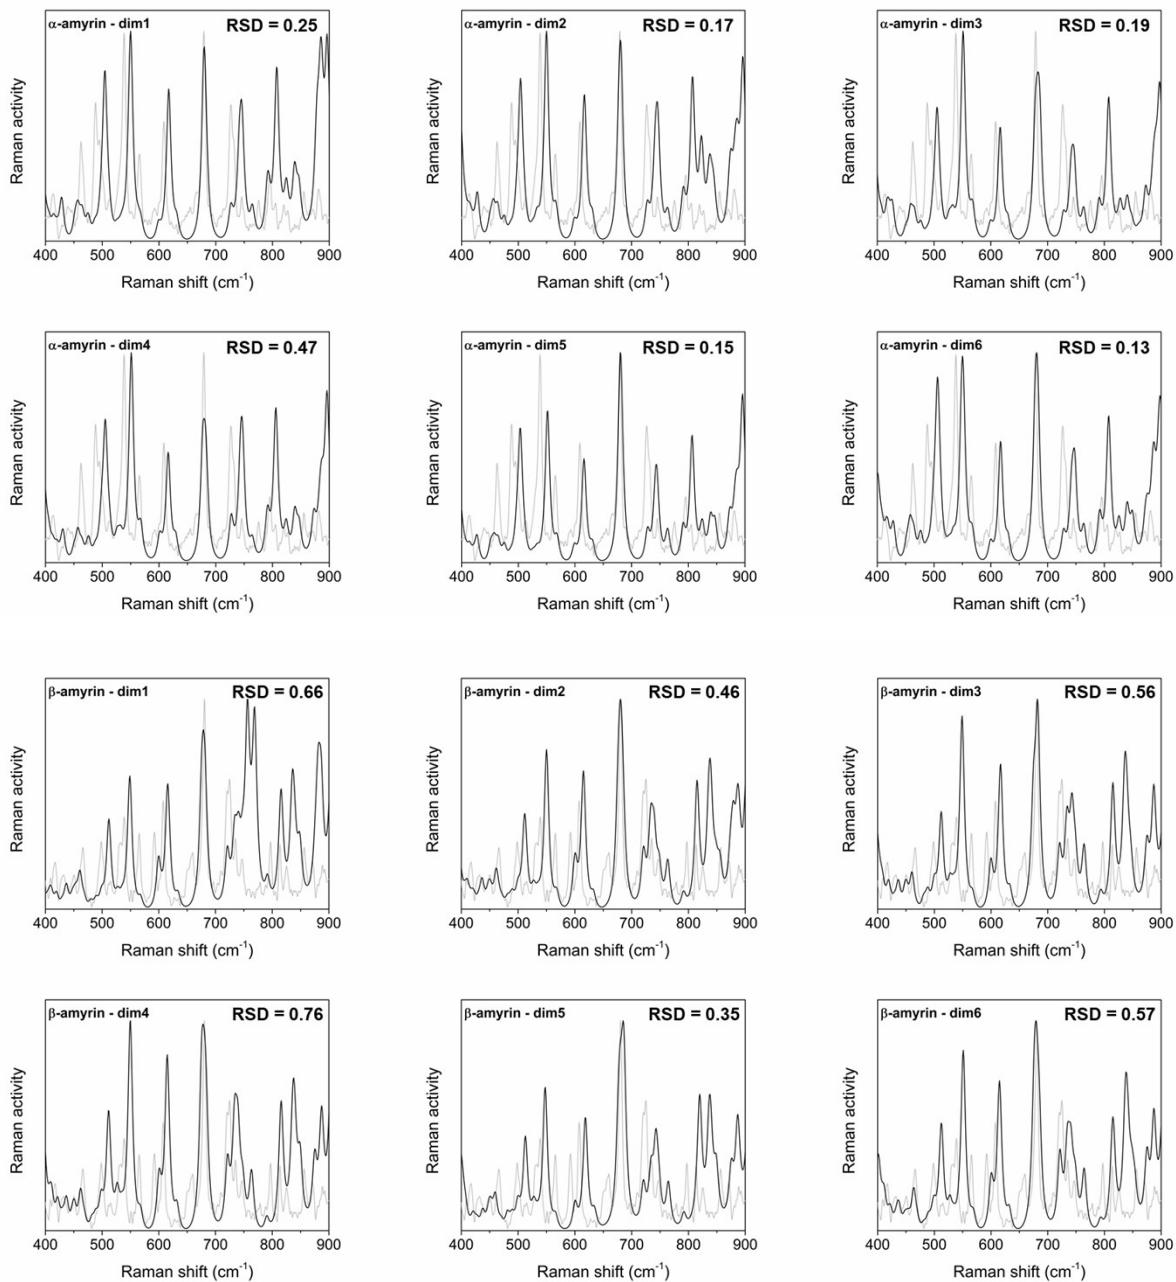



## *n*-HEXANE

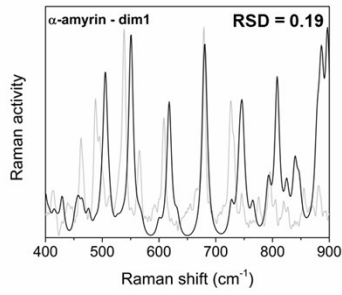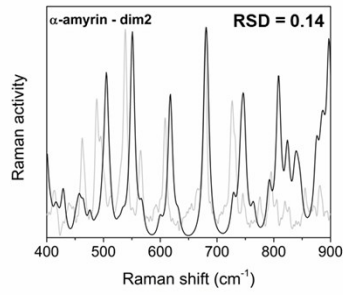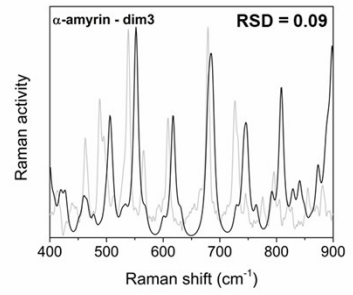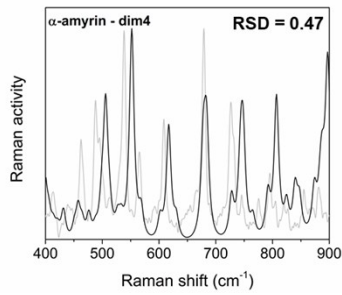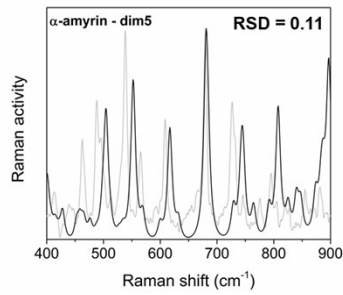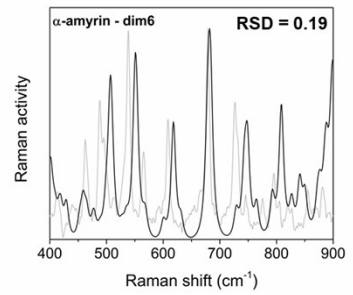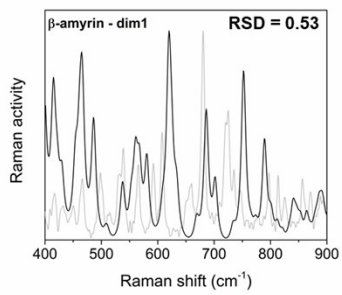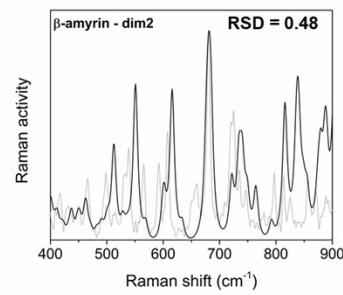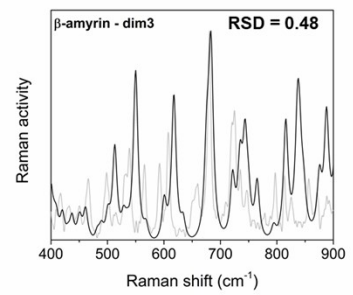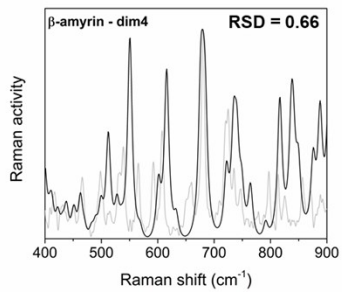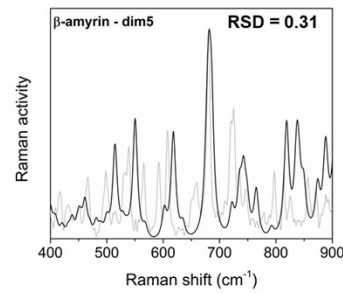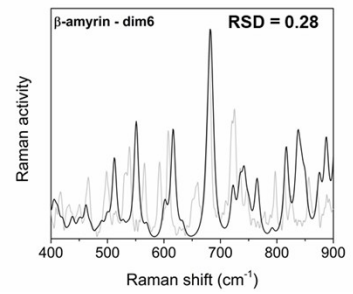

**Figure S6.-** Relative intensity patterns of the calculated dimeric aggregates for  $\alpha$ - and  $\beta$ -amyrin together with the experimental Raman spectra.

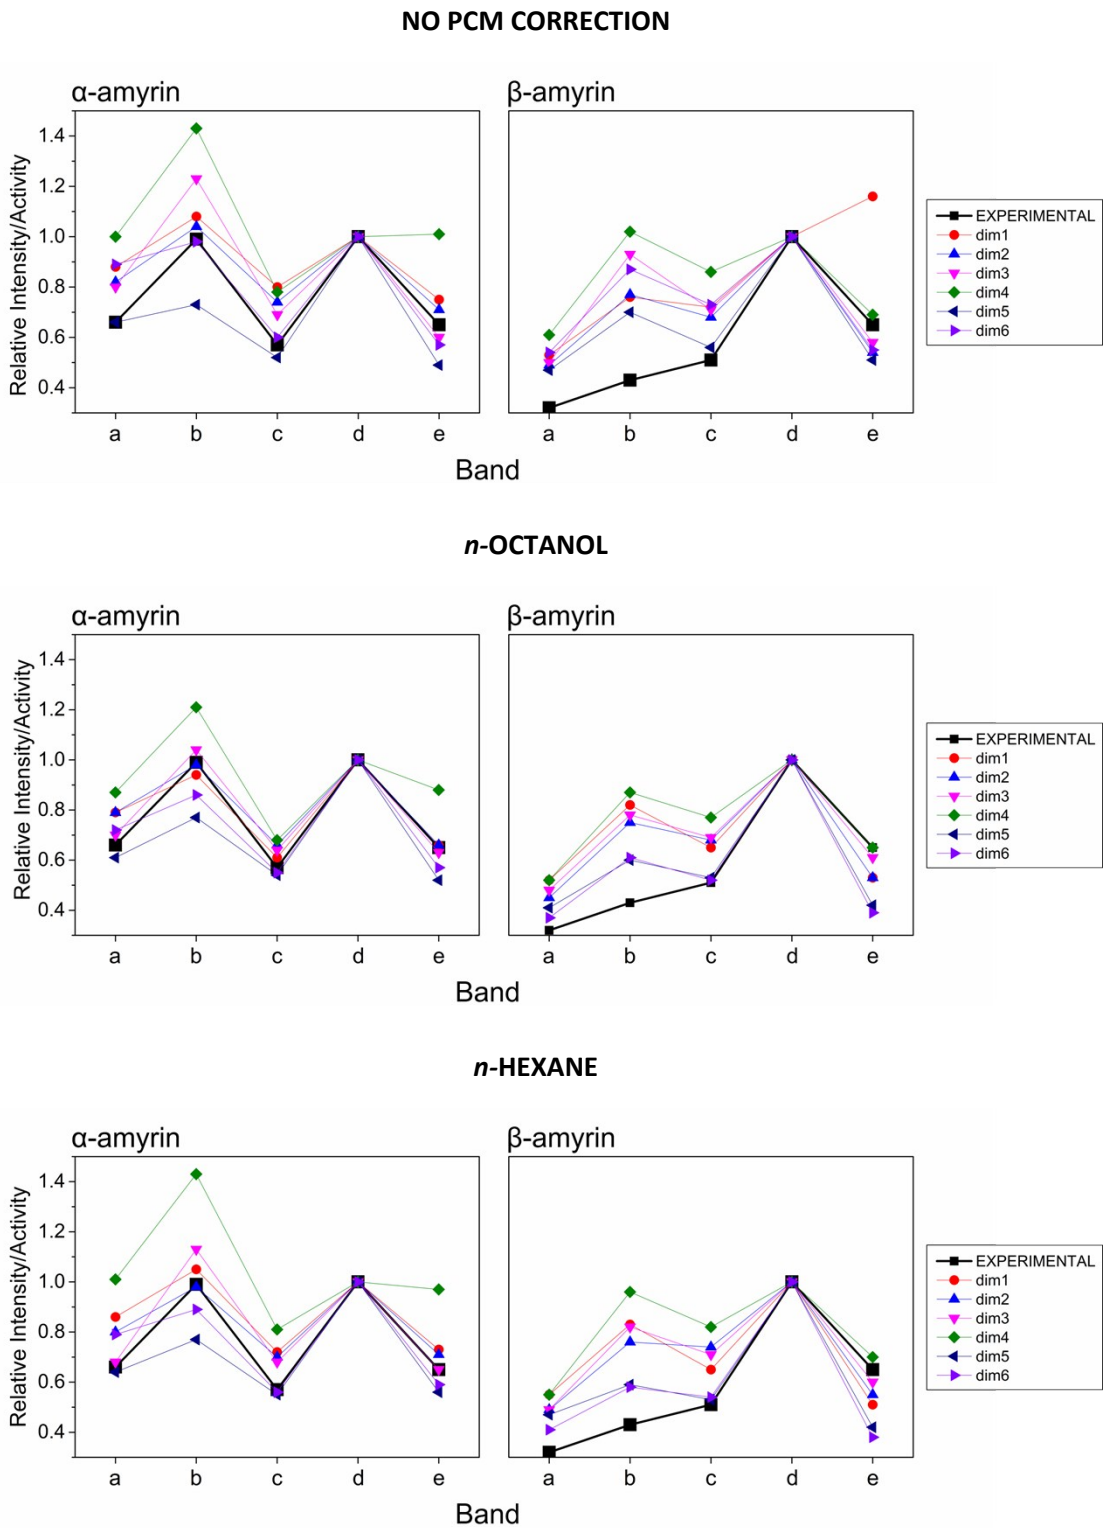

Figure S7.- Experimental intermolecular distances for  $\alpha$ - and  $\beta$ -amyrin derivatives obtained from CIF files.

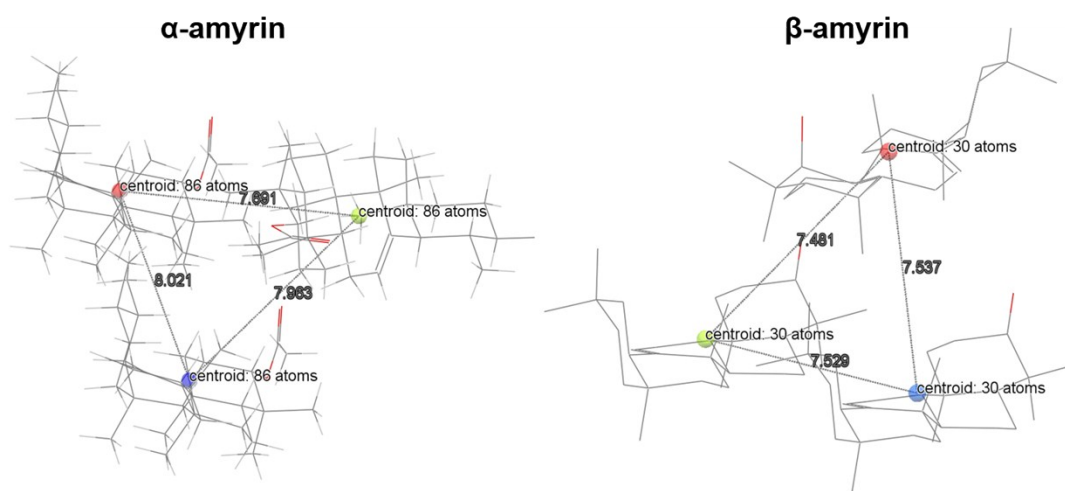

|      | distances |       |       |
|------|-----------|-------|-------|
| alfa | 7.691     | 7.963 | 8.021 |
| beta | 7.481     | 7.529 | 7.537 |

**Figure S8.-** Comparison of the experimental Raman spectra at room temperature (gray) with those calculated for  $\alpha$ - and  $\beta$ -amyrin trimers in the three PCM options (black).

**NO PCM CORRECTION**

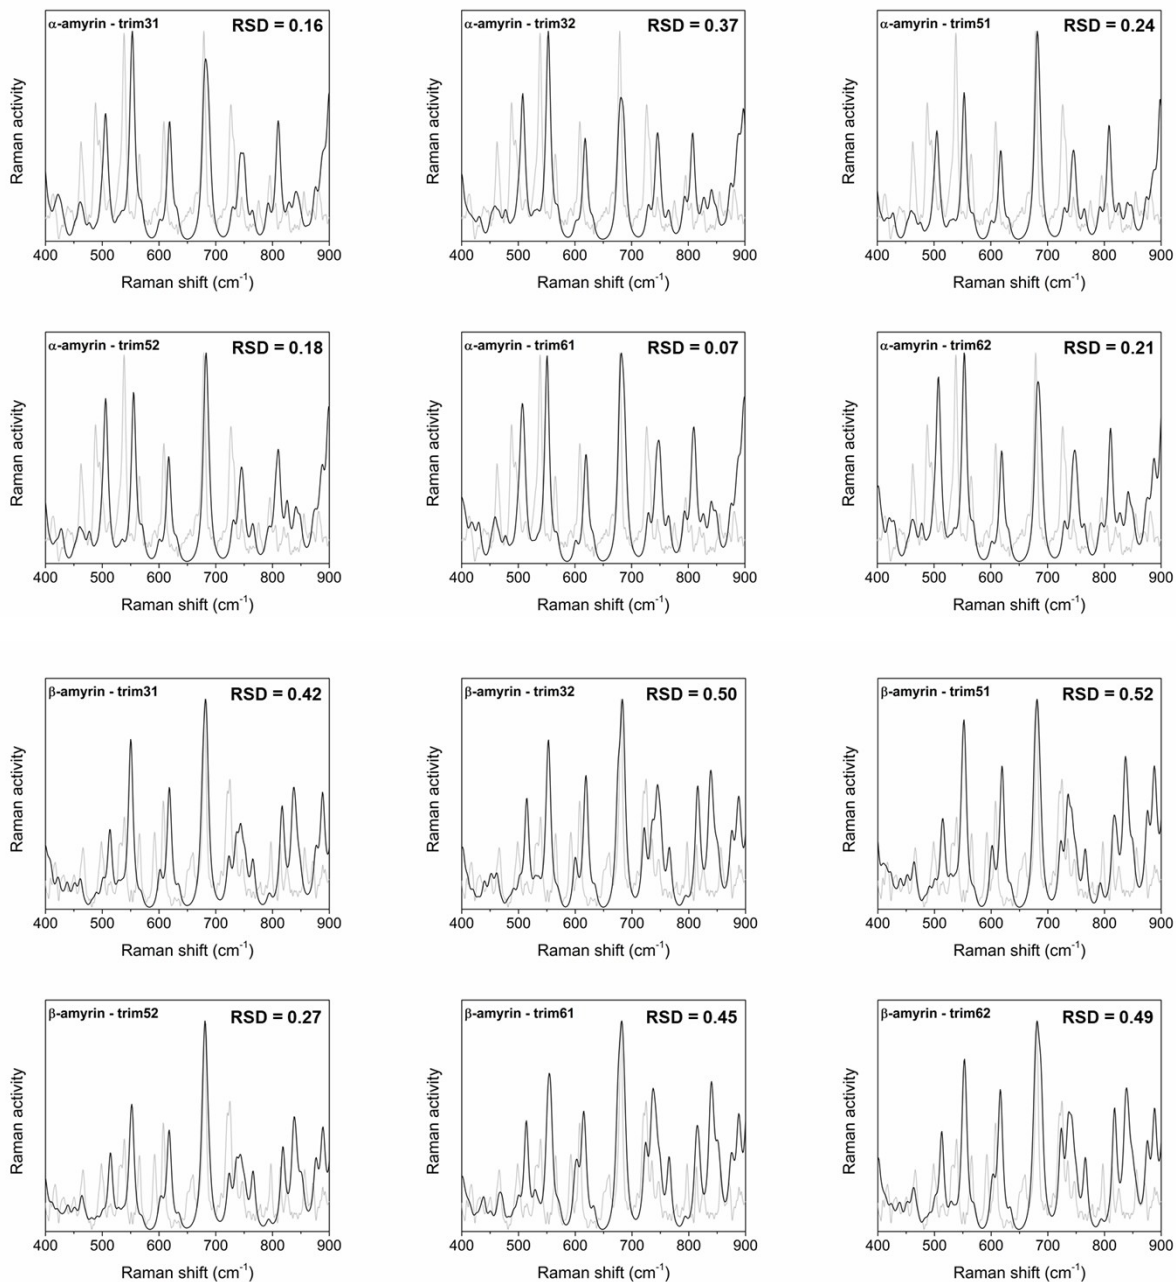





## *n*-HEXANE

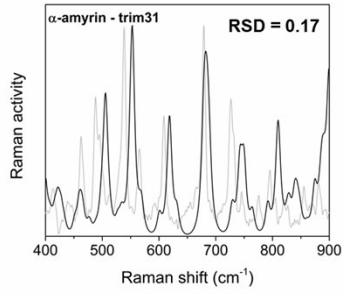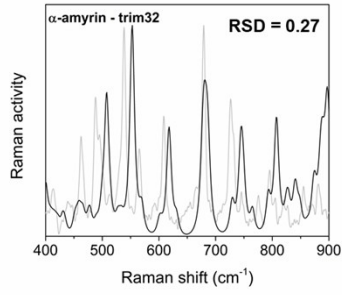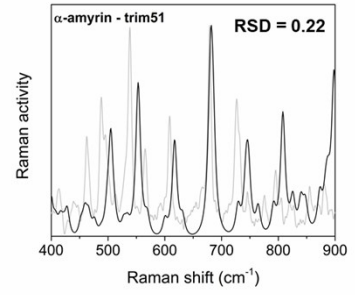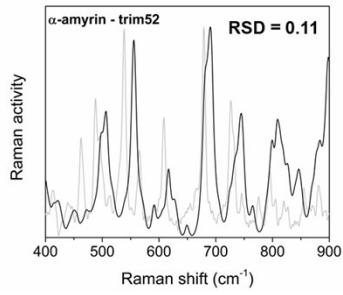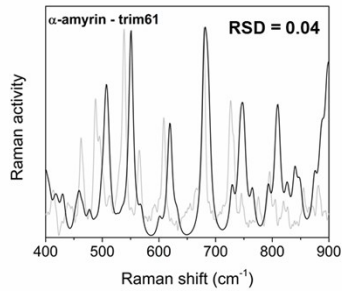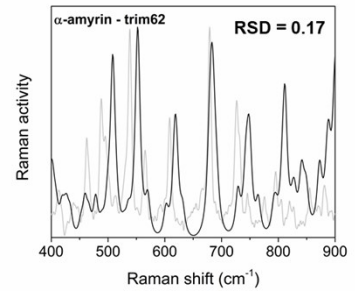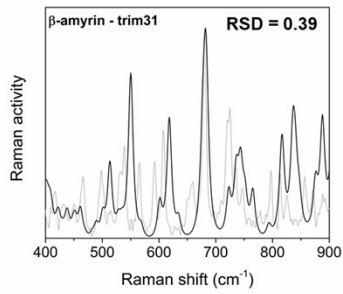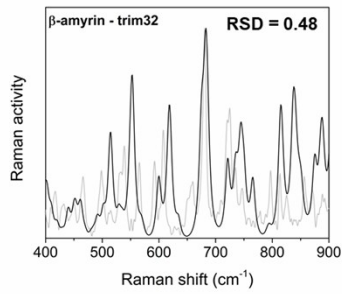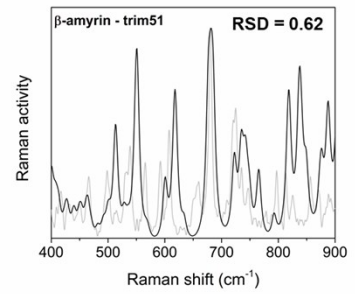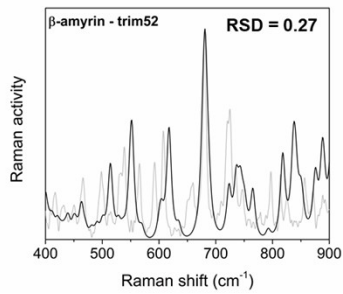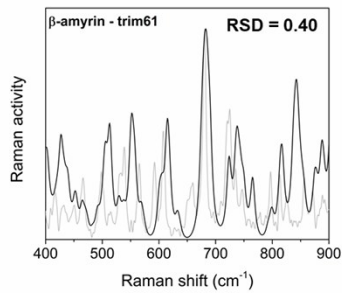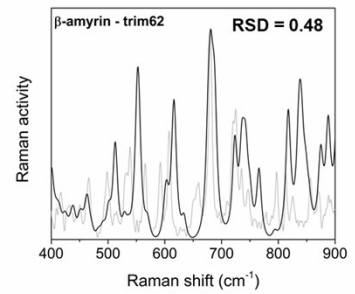



**Figure S9.-** Relative intensity patterns of the calculated trimeric aggregates in *n*-octanol for  $\alpha$ - and  $\beta$ -amyrin together with the experimental Raman spectra.

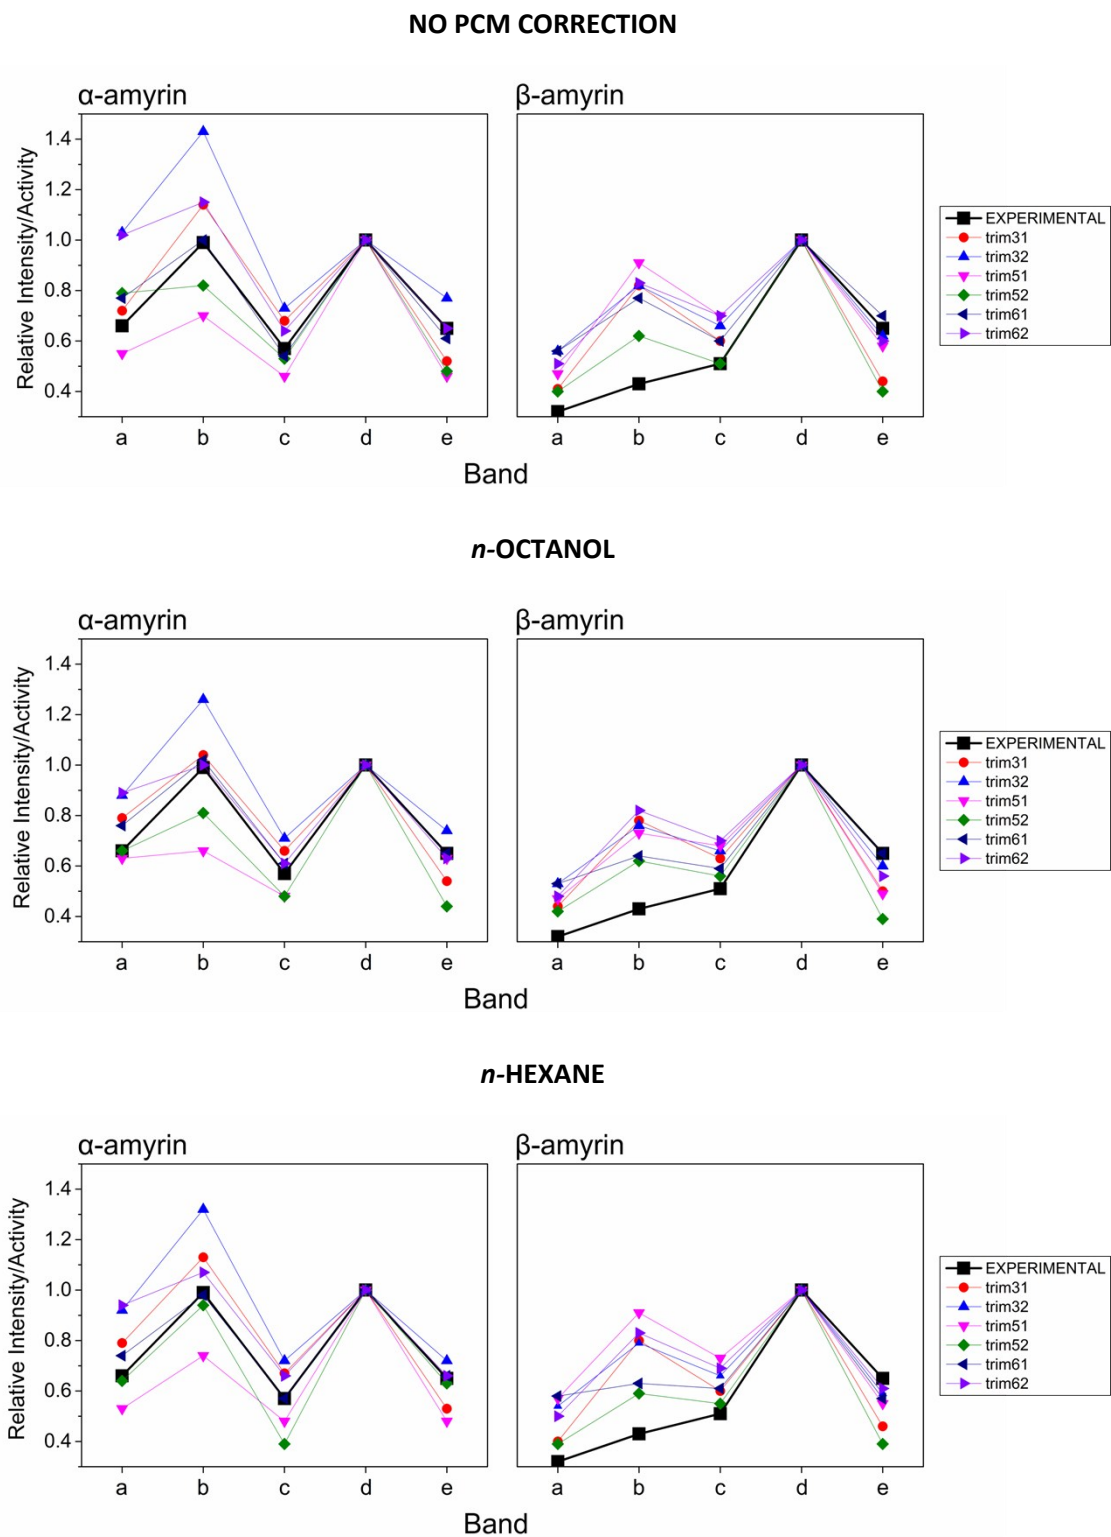

**Figure S10.-** Relative concentrations of amylin conformers obtained by Maxwell–Boltzmann populations in dimer M-B and trimer M-B.

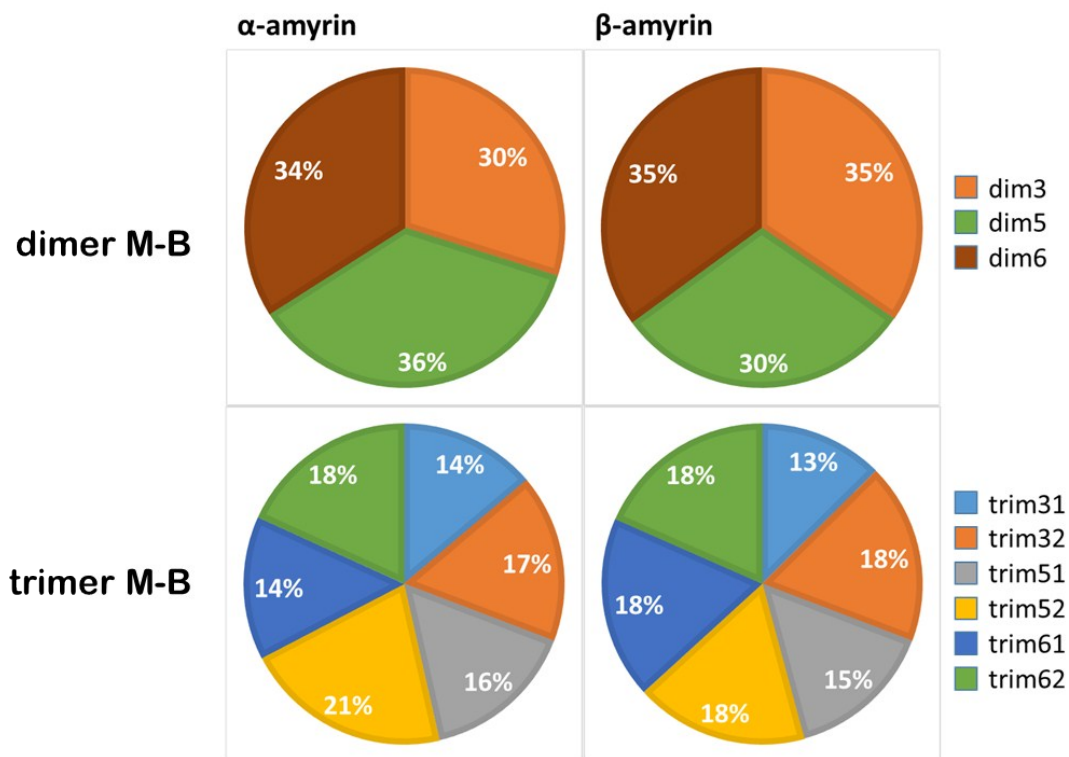

**Table TS5.-** Relative standard deviation (RSD) values for the calculated Raman spectra in *n*-octanol compared with the experimental ones obtained at different temperatures. Results are shown for molecular stacking aggregates (dimers and trimers) and their Maxwell-Boltzmann distributed average (M-B).

| Aggregation        | $\alpha$ -amyrin |      |      |      | $\beta$ -amyrin |      |      |      |
|--------------------|------------------|------|------|------|-----------------|------|------|------|
|                    | 300K             | 200K | 150K | 77K  | 300K            | 200K | 150K | 77K  |
| <b>dim3</b>        | 0.07             | 0.08 | 0.13 | 0.13 | 0.43            | 0.33 | 0.36 | 0.32 |
| <b>dim5</b>        | 0.14             | 0.12 | 0.09 | 0.08 | 0.27            | 0.19 | 0.21 | 0.18 |
| <b>dim6</b>        | 0.10             | 0.10 | 0.09 | 0.08 | 0.25            | 0.18 | 0.19 | 0.17 |
| <b>M-B dimers</b>  | 0.09             | 0.08 | 0.06 | 0.05 | 0.26            | 0.18 | 0.20 | 0.17 |
| <b>trim31</b>      | 0.14             | 0.16 | 0.20 | 0.21 | 0.41            | 0.32 | 0.34 | 0.30 |
| <b>trim32</b>      | 0.25             | 0.27 | 0.34 | 0.33 | 0.45            | 0.35 | 0.38 | 0.34 |
| <b>trim51</b>      | 0.14             | 0.13 | 0.13 | 0.11 | 0.44            | 0.34 | 0.37 | 0.33 |
| <b>trim52</b>      | 0.17             | 0.17 | 0.16 | 0.15 | 0.31            | 0.24 | 0.26 | 0.22 |
| <b>trim61</b>      | 0.06             | 0.08 | 0.14 | 0.13 | 0.33            | 0.27 | 0.30 | 0.24 |
| <b>trim62</b>      | 0.11             | 0.13 | 0.18 | 0.18 | 0.48            | 0.38 | 0.40 | 0.36 |
| <b>M-B trimers</b> | 0.11             | 0.11 | 0.10 | 0.09 | 0.35            | 0.26 | 0.28 | 0.25 |
